# Supplementary material for: A Novel Ultrasonographic Anthropometric-Independent Measurement of Median Nerve Swelling in Carpal Tunnel Syndrome: The “Nerve/Tendon Ratio” (NTR)
Source: MDPI journal article supplement (doi:10.3390/diagnostics12112621), 2022-10-28
Supplement: s1 [file s1]

## Partial Correlation

Partial Correlation

|                          |                | NTR                   | MN-CSA                | SCV<br>sens.conduct.vel. | ML Motor<br>Latency  | Padua<br>Scale |
|--------------------------|----------------|-----------------------|-----------------------|--------------------------|----------------------|----------------|
| NTR                      | Spearman's rho | —                     |                       |                          |                      |                |
|                          | p-value        | —                     |                       |                          |                      |                |
| MN-CSA                   | Spearman's rho | 0.564 <sup>***</sup>  | —                     |                          |                      |                |
|                          | p-value        | < .001                | —                     |                          |                      |                |
| SCV<br>sens.conduct.vel. | Spearman's rho | -0.623 <sup>***</sup> | -0.558 <sup>***</sup> | —                        |                      |                |
|                          | p-value        | < .001                | < .001                | —                        |                      |                |
| ML Motor Latency         | Spearman's rho | 0.606 <sup>***</sup>  | 0.470 <sup>***</sup>  | -0.910 <sup>***</sup>    | —                    |                |
|                          | p-value        | < .001                | < .001                | < .001                   | —                    |                |
| Padua Scale              | Spearman's rho | 0.674 <sup>***</sup>  | 0.642 <sup>***</sup>  | -0.932 <sup>***</sup>    | 0.874 <sup>***</sup> | —              |
|                          | p-value        | < .001                | < .001                | < .001                   | < .001               | —              |

Note. controlling for 'Height (cm)', 'Wrist circumf.', and 'Wheight (Kg)'

Note. \* p < .05, \*\* p < .01, \*\*\* p < .001
