# Supplementary material for: A Novel Ultrasonographic Anthropometric-Independent Measurement of Median Nerve Swelling in Carpal Tunnel Syndrome: The “Nerve/Tendon Ratio” (NTR)
Source: MDPI journal article supplement (doi:10.3390/diagnostics12112621), 2022-10-28
Supplement: s1 [file s1]

Binomial regression analysis between US parameters (both MN-CSA and NTR) vs diagnostic gold standard (both clinical CTS and EDS-defined severe CTS). The best cut-off (derived from Youden j-Statistic) is marked in **bold**, whereas the cut-off with the best positive predictive value is marker in ***bold italics***, all along the tables.

- MN-CSA vs CTS-clinical diagnosis (as gold standard)

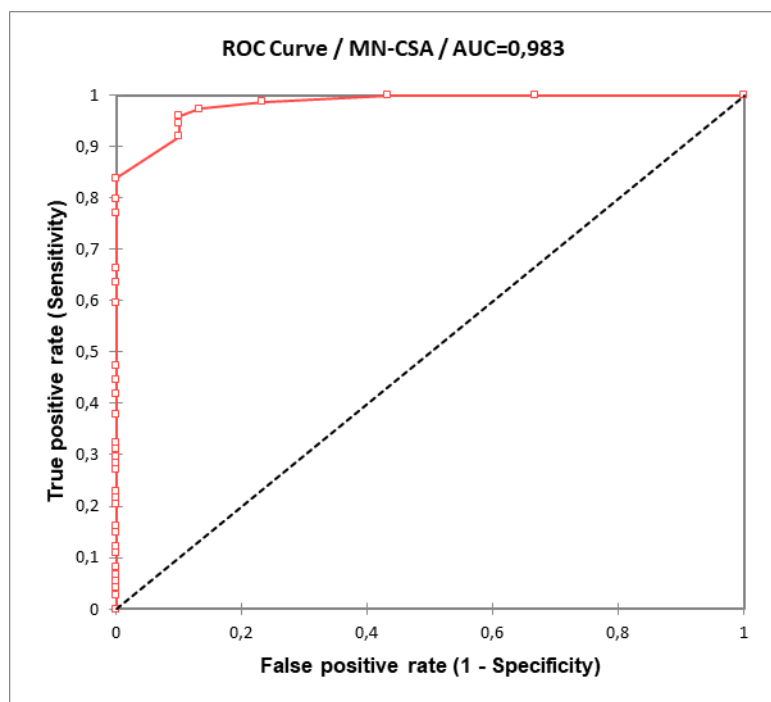

| MN-CSA              | Sensitivity         | Lower bound (95%)   | Upper bound (95%)   | Specificity         | Lower bound (95%)   | Upper bound (95%)   | PPV                 | NPV                 | LR+                | LR-                 | Sensitivity+Specificity | Accuracy            |
|---------------------|---------------------|---------------------|---------------------|---------------------|---------------------|---------------------|---------------------|---------------------|--------------------|---------------------|-------------------------|---------------------|
| 4,000               | 1,000               | 0,939               | 1,000               | 0,333               | 0,192               | 0,514               | 0,787               | 1,000               | 1,500              | 0,000               | 1,333                   | 0,808               |
| 5,000               | 1,000               | 0,939               | 1,000               | 0,567               | 0,392               | 0,726               | 0,851               | 1,000               | 2,308              | 0,000               | 1,567                   | 0,875               |
| 6,000               | 0,986               | 0,919               | 1,000               | 0,767               | 0,587               | 0,884               | 0,913               | 0,958               | 4,228              | 0,018               | 1,753                   | 0,923               |
| 7,000               | 0,973               | 0,900               | 0,998               | 0,867               | 0,695               | 0,952               | 0,947               | 0,929               | 7,297              | 0,031               | 1,840                   | 0,942               |
| <b>8,000</b>        | <b>0,959</b>        | <b>0,882</b>        | <b>0,990</b>        | <b>0,900</b>        | <b>0,734</b>        | <b>0,972</b>        | <b>0,959</b>        | <b>0,900</b>        | <b>9,595</b>       | <b>0,045</b>        | <b>1,859</b>            | <b>0,942</b>        |
| 8,300               | 0,946               | 0,864               | 0,982               | 0,900               | 0,734               | 0,972               | 0,959               | 0,871               | 9,459              | 0,060               | 1,846                   | 0,933               |
| 8,600               | 0,919               | 0,830               | 0,965               | 0,900               | 0,734               | 0,972               | 0,958               | 0,818               | 9,189              | 0,090               | 1,819                   | 0,913               |
| <b><i>9,000</i></b> | <b><i>0,838</i></b> | <b><i>0,735</i></b> | <b><i>0,906</i></b> | <b><i>1,000</i></b> | <b><i>0,862</i></b> | <b><i>1,000</i></b> | <b><i>1,000</i></b> | <b><i>0,714</i></b> | <b><i>+Inf</i></b> | <b><i>0,162</i></b> | <b><i>1,838</i></b>     | <b><i>0,885</i></b> |
| 9,300               | 0,797               | 0,690               | 0,874               | 1,000               | 0,862               | 1,000               | 1,000               | 0,667               | +Inf               | 0,203               | 1,797                   | 0,856               |
| 9,600               | 0,770               | 0,661               | 0,852               | 1,000               | 0,862               | 1,000               | 1,000               | 0,638               | +Inf               | 0,230               | 1,770                   | 0,837               |
| 10,000              | 0,662               | 0,548               | 0,759               | 1,000               | 0,862               | 1,000               | 1,000               | 0,545               | +Inf               | 0,338               | 1,662                   | 0,760               |
| 10,300              | 0,635               | 0,521               | 0,735               | 1,000               | 0,862               | 1,000               | 1,000               | 0,526               | +Inf               | 0,365               | 1,635                   | 0,740               |
| 10,600              | 0,595               | 0,481               | 0,699               | 1,000               | 0,862               | 1,000               | 1,000               | 0,500               | +Inf               | 0,405               | 1,595                   | 0,712               |
| 11,000              | 0,473               | 0,364               | 0,585               | 1,000               | 0,862               | 1,000               | 1,000               | 0,435               | +Inf               | 0,527               | 1,473                   | 0,625               |
| 11,300              | 0,446               | 0,338               | 0,559               | 1,000               | 0,862               | 1,000               | 1,000               | 0,423               | +Inf               | 0,554               | 1,446                   | 0,606               |
| 11,500              | 0,419               | 0,313               | 0,533               | 1,000               | 0,862               | 1,000               | 1,000               | 0,411               | +Inf               | 0,581               | 1,419                   | 0,587               |
| 11,600              | 0,378               | 0,277               | 0,493               | 1,000               | 0,862               | 1,000               | 1,000               | 0,395               | +Inf               | 0,622               | 1,378                   | 0,558               |
| 12,000              | 0,324               | 0,229               | 0,438               | 1,000               | 0,862               | 1,000               | 1,000               | 0,375               | +Inf               | 0,676               | 1,324                   | 0,519               |

|        |       |       |       |       |       |       |       |       |      |       |       |       |
|--------|-------|-------|-------|-------|-------|-------|-------|-------|------|-------|-------|-------|
| 12,300 | 0,311 | 0,217 | 0,424 | 1,000 | 0,862 | 1,000 | 1,000 | 0,370 | +Inf | 0,689 | 1,311 | 0,510 |
| 12,600 | 0,297 | 0,205 | 0,410 | 1,000 | 0,862 | 1,000 | 1,000 | 0,366 | +Inf | 0,703 | 1,297 | 0,500 |
| 13,000 | 0,284 | 0,194 | 0,396 | 1,000 | 0,862 | 1,000 | 1,000 | 0,361 | +Inf | 0,716 | 1,284 | 0,490 |
| 13,300 | 0,270 | 0,182 | 0,382 | 1,000 | 0,862 | 1,000 | 1,000 | 0,357 | +Inf | 0,730 | 1,270 | 0,481 |
| 14,000 | 0,230 | 0,148 | 0,339 | 1,000 | 0,862 | 1,000 | 1,000 | 0,345 | +Inf | 0,770 | 1,230 | 0,452 |
| 14,300 | 0,216 | 0,137 | 0,324 | 1,000 | 0,862 | 1,000 | 1,000 | 0,341 | +Inf | 0,784 | 1,216 | 0,442 |
| 14,600 | 0,203 | 0,126 | 0,310 | 1,000 | 0,862 | 1,000 | 1,000 | 0,337 | +Inf | 0,797 | 1,203 | 0,433 |
| 15,000 | 0,162 | 0,094 | 0,265 | 1,000 | 0,862 | 1,000 | 1,000 | 0,326 | +Inf | 0,838 | 1,162 | 0,404 |
| 15,300 | 0,149 | 0,084 | 0,249 | 1,000 | 0,862 | 1,000 | 1,000 | 0,323 | +Inf | 0,851 | 1,149 | 0,394 |
| 16,000 | 0,122 | 0,064 | 0,218 | 1,000 | 0,862 | 1,000 | 1,000 | 0,316 | +Inf | 0,878 | 1,122 | 0,375 |
| 16,600 | 0,108 | 0,054 | 0,202 | 1,000 | 0,862 | 1,000 | 1,000 | 0,313 | +Inf | 0,892 | 1,108 | 0,365 |
| 17,000 | 0,081 | 0,035 | 0,170 | 1,000 | 0,862 | 1,000 | 1,000 | 0,306 | +Inf | 0,919 | 1,081 | 0,346 |
| 17,300 | 0,068 | 0,026 | 0,153 | 1,000 | 0,862 | 1,000 | 1,000 | 0,303 | +Inf | 0,932 | 1,068 | 0,337 |
| 19,000 | 0,054 | 0,018 | 0,136 | 1,000 | 0,862 | 1,000 | 1,000 | 0,300 | +Inf | 0,946 | 1,054 | 0,327 |
| 19,600 | 0,041 | 0,010 | 0,118 | 1,000 | 0,862 | 1,000 | 1,000 | 0,297 | +Inf | 0,959 | 1,041 | 0,317 |
| 21,000 | 0,027 | 0,002 | 0,100 | 1,000 | 0,862 | 1,000 | 1,000 | 0,294 | +Inf | 0,973 | 1,027 | 0,308 |
| 22,000 | 0,000 | 0,000 | 0,061 | 1,000 | 0,862 | 1,000 |       | 0,288 |      | 1,000 | 1,000 | 0,288 |

| AUC   | Standard error | Lower bound (95%) | Upper bound (95%) |
|-------|----------------|-------------------|-------------------|
| 0,983 | 0,009          | 0,966             | 1,000             |

|                      |          |
|----------------------|----------|
| Difference           | 0,483    |
| z (Observed value)   | 56,251   |
| z (Critical value)   | 1,960    |
| p-value (Two-tailed) | < 0,0001 |
| alpha                | 0,05     |

- NTR vs CTS-clinical diagnosis (as gold standard)

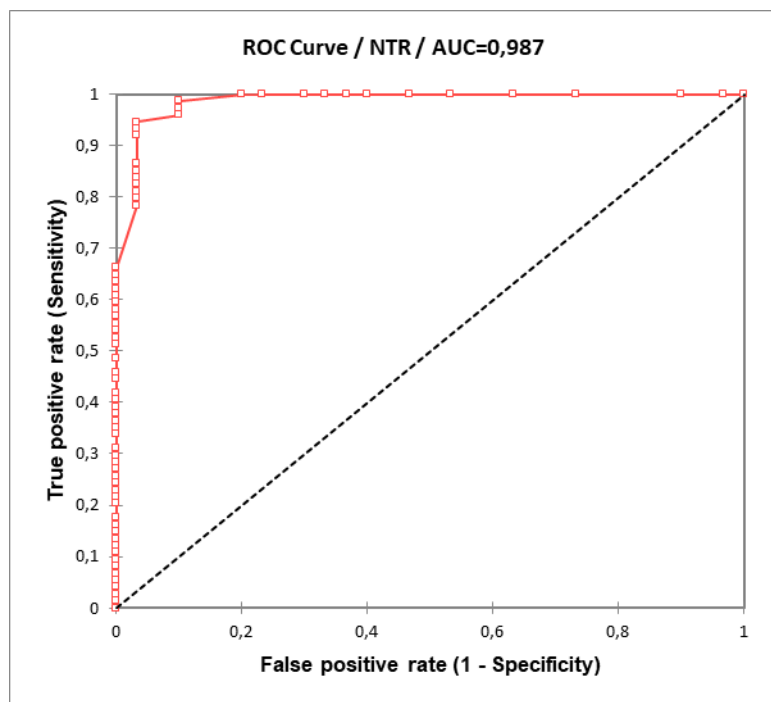

| NTR           | Sensitivity  | Lower bound (95%) | Upper bound (95%) | Specificity  | Lower bound (95%) | Upper bound (95%) | PPV          | NPV          | LR+           | LR-          | Sensitivity+Specificity | Accuracy     |
|---------------|--------------|-------------------|-------------------|--------------|-------------------|-------------------|--------------|--------------|---------------|--------------|-------------------------|--------------|
| 41,670        | 1,000        | 0,939             | 1,000             | 0,033        | 0,000             | 0,184             | 0,718        | 1,000        | 1,034         | 0,000        | 1,033                   | 0,721        |
| 44,440        | 1,000        | 0,939             | 1,000             | 0,100        | 0,028             | 0,266             | 0,733        | 1,000        | 1,111         | 0,000        | 1,100                   | 0,740        |
| 50,000        | 1,000        | 0,939             | 1,000             | 0,267        | 0,141             | 0,447             | 0,771        | 1,000        | 1,364         | 0,000        | 1,267                   | 0,788        |
| 55,560        | 1,000        | 0,939             | 1,000             | 0,367        | 0,219             | 0,546             | 0,796        | 1,000        | 1,579         | 0,000        | 1,367                   | 0,817        |
| 57,140        | 1,000        | 0,939             | 1,000             | 0,467        | 0,303             | 0,638             | 0,822        | 1,000        | 1,875         | 0,000        | 1,467                   | 0,846        |
| 60,000        | 1,000        | 0,939             | 1,000             | 0,533        | 0,362             | 0,697             | 0,841        | 1,000        | 2,143         | 0,000        | 1,533                   | 0,865        |
| 62,500        | 1,000        | 0,939             | 1,000             | 0,600        | 0,423             | 0,754             | 0,860        | 1,000        | 2,500         | 0,000        | 1,600                   | 0,885        |
| 63,640        | 1,000        | 0,939             | 1,000             | 0,633        | 0,454             | 0,781             | 0,871        | 1,000        | 2,727         | 0,000        | 1,633                   | 0,894        |
| 66,670        | 1,000        | 0,939             | 1,000             | 0,667        | 0,486             | 0,808             | 0,881        | 1,000        | 3,000         | 0,000        | 1,667                   | 0,904        |
| 71,430        | 1,000        | 0,939             | 1,000             | 0,700        | 0,519             | 0,834             | 0,892        | 1,000        | 3,333         | 0,000        | 1,700                   | 0,913        |
| 72,000        | 1,000        | 0,939             | 1,000             | 0,767        | 0,587             | 0,884             | 0,914        | 1,000        | 4,286         | 0,000        | 1,767                   | 0,933        |
| 72,730        | 1,000        | 0,939             | 1,000             | 0,800        | 0,622             | 0,907             | 0,925        | 1,000        | 5,000         | 0,000        | 1,800                   | 0,942        |
| 75,000        | 0,986        | 0,919             | 1,000             | 0,900        | 0,734             | 0,972             | 0,961        | 0,964        | 9,865         | 0,015        | 1,886                   | 0,962        |
| 76,900        | 0,973        | 0,900             | 0,998             | 0,900        | 0,734             | 0,972             | 0,960        | 0,931        | 9,730         | 0,030        | 1,873                   | 0,952        |
| 82,800        | 0,959        | 0,882             | 0,990             | 0,900        | 0,734             | 0,972             | 0,959        | 0,900        | 9,595         | 0,045        | 1,859                   | 0,942        |
| <b>83,000</b> | <b>0,946</b> | <b>0,864</b>      | <b>0,982</b>      | <b>0,967</b> | <b>0,816</b>      | <b>1,000</b>      | <b>0,986</b> | <b>0,879</b> | <b>28,378</b> | <b>0,056</b> | <b>1,913</b>            | <b>0,952</b> |
| 85,700        | 0,932        | 0,847             | 0,974             | 0,967        | 0,816             | 1,000             | 0,986        | 0,853        | 27,973        | 0,070        | 1,899                   | 0,942        |
| 89,200        | 0,919        | 0,830             | 0,965             | 0,967        | 0,816             | 1,000             | 0,986        | 0,829        | 27,568        | 0,084        | 1,886                   | 0,933        |
| 90,000        | 0,865        | 0,766             | 0,926             | 0,967        | 0,816             | 1,000             | 0,985        | 0,744        | 25,946        | 0,140        | 1,832                   | 0,894        |
| 92,200        | 0,851        | 0,751             | 0,916             | 0,967        | 0,816             | 1,000             | 0,984        | 0,725        | 25,541        | 0,154        | 1,818                   | 0,885        |
| 92,300        | 0,838        | 0,735             | 0,906             | 0,967        | 0,816             | 1,000             | 0,984        | 0,707        | 25,135        | 0,168        | 1,805                   | 0,875        |
| 93,000        | 0,824        | 0,720             | 0,895             | 0,967        | 0,816             | 1,000             | 0,984        | 0,690        | 24,730        | 0,182        | 1,791                   | 0,865        |
| 95,000        | 0,811        | 0,705             | 0,884             | 0,967        | 0,816             | 1,000             | 0,984        | 0,674        | 24,324        | 0,196        | 1,777                   | 0,856        |

|                |              |              |              |              |              |              |              |              |             |              |              |              |
|----------------|--------------|--------------|--------------|--------------|--------------|--------------|--------------|--------------|-------------|--------------|--------------|--------------|
| 96,000         | 0,797        | 0,690        | 0,874        | 0,967        | 0,816        | 1,000        | 0,983        | 0,659        | 23,919      | 0,210        | 1,764        | 0,846        |
| 96,360         | 0,784        | 0,676        | 0,863        | 0,967        | 0,816        | 1,000        | 0,983        | 0,644        | 23,514      | 0,224        | 1,750        | 0,837        |
| <b>100,000</b> | <b>0,662</b> | <b>0,548</b> | <b>0,759</b> | <b>1,000</b> | <b>0,862</b> | <b>1,000</b> | <b>1,000</b> | <b>0,545</b> | <b>+Inf</b> | <b>0,338</b> | <b>1,662</b> | <b>0,760</b> |
| 102,100        | 0,649        | 0,535        | 0,747        | 1,000        | 0,862        | 1,000        | 1,000        | 0,536        | +Inf        | 0,351        | 1,649        | 0,750        |
| 102,720        | 0,635        | 0,521        | 0,735        | 1,000        | 0,862        | 1,000        | 1,000        | 0,526        | +Inf        | 0,365        | 1,635        | 0,740        |
| 103,000        | 0,622        | 0,507        | 0,723        | 1,000        | 0,862        | 1,000        | 1,000        | 0,517        | +Inf        | 0,378        | 1,622        | 0,731        |
| 103,300        | 0,608        | 0,494        | 0,711        | 1,000        | 0,862        | 1,000        | 1,000        | 0,508        | +Inf        | 0,392        | 1,608        | 0,721        |
| 104,000        | 0,595        | 0,481        | 0,699        | 1,000        | 0,862        | 1,000        | 1,000        | 0,500        | +Inf        | 0,405        | 1,595        | 0,712        |
| 105,400        | 0,581        | 0,467        | 0,687        | 1,000        | 0,862        | 1,000        | 1,000        | 0,492        | +Inf        | 0,419        | 1,581        | 0,702        |
| 106,000        | 0,568        | 0,454        | 0,674        | 1,000        | 0,862        | 1,000        | 1,000        | 0,484        | +Inf        | 0,432        | 1,568        | 0,692        |
| 106,600        | 0,554        | 0,441        | 0,662        | 1,000        | 0,862        | 1,000        | 1,000        | 0,476        | +Inf        | 0,446        | 1,554        | 0,683        |
| 107,600        | 0,541        | 0,428        | 0,649        | 1,000        | 0,862        | 1,000        | 1,000        | 0,469        | +Inf        | 0,459        | 1,541        | 0,673        |
| 107,690        | 0,527        | 0,415        | 0,636        | 1,000        | 0,862        | 1,000        | 1,000        | 0,462        | +Inf        | 0,473        | 1,527        | 0,663        |
| 109,100        | 0,514        | 0,402        | 0,624        | 1,000        | 0,862        | 1,000        | 1,000        | 0,455        | +Inf        | 0,486        | 1,514        | 0,654        |
| 110,000        | 0,486        | 0,376        | 0,598        | 1,000        | 0,862        | 1,000        | 1,000        | 0,441        | +Inf        | 0,514        | 1,486        | 0,635        |
| 111,000        | 0,459        | 0,351        | 0,572        | 1,000        | 0,862        | 1,000        | 1,000        | 0,429        | +Inf        | 0,541        | 1,459        | 0,615        |
| 111,800        | 0,446        | 0,338        | 0,559        | 1,000        | 0,862        | 1,000        | 1,000        | 0,423        | +Inf        | 0,554        | 1,446        | 0,606        |
| 112,500        | 0,419        | 0,313        | 0,533        | 1,000        | 0,862        | 1,000        | 1,000        | 0,411        | +Inf        | 0,581        | 1,419        | 0,587        |
| 113,000        | 0,405        | 0,301        | 0,519        | 1,000        | 0,862        | 1,000        | 1,000        | 0,405        | +Inf        | 0,595        | 1,405        | 0,577        |
| 114,400        | 0,392        | 0,289        | 0,506        | 1,000        | 0,862        | 1,000        | 1,000        | 0,400        | +Inf        | 0,608        | 1,392        | 0,567        |
| 115,000        | 0,378        | 0,277        | 0,493        | 1,000        | 0,862        | 1,000        | 1,000        | 0,395        | +Inf        | 0,622        | 1,378        | 0,558        |
| 116,000        | 0,365        | 0,265        | 0,479        | 1,000        | 0,862        | 1,000        | 1,000        | 0,390        | +Inf        | 0,635        | 1,365        | 0,548        |
| 116,200        | 0,351        | 0,253        | 0,465        | 1,000        | 0,862        | 1,000        | 1,000        | 0,385        | +Inf        | 0,649        | 1,351        | 0,538        |
| 116,250        | 0,338        | 0,241        | 0,452        | 1,000        | 0,862        | 1,000        | 1,000        | 0,380        | +Inf        | 0,662        | 1,338        | 0,529        |
| 120,000        | 0,311        | 0,217        | 0,424        | 1,000        | 0,862        | 1,000        | 1,000        | 0,370        | +Inf        | 0,689        | 1,311        | 0,510        |
| 120,900        | 0,297        | 0,205        | 0,410        | 1,000        | 0,862        | 1,000        | 1,000        | 0,366        | +Inf        | 0,703        | 1,297        | 0,500        |
| 122,000        | 0,284        | 0,194        | 0,396        | 1,000        | 0,862        | 1,000        | 1,000        | 0,361        | +Inf        | 0,716        | 1,284        | 0,490        |
| 122,200        | 0,270        | 0,182        | 0,382        | 1,000        | 0,862        | 1,000        | 1,000        | 0,357        | +Inf        | 0,730        | 1,270        | 0,481        |
| 122,800        | 0,257        | 0,171        | 0,368        | 1,000        | 0,862        | 1,000        | 1,000        | 0,353        | +Inf        | 0,743        | 1,257        | 0,471        |
| 126,000        | 0,243        | 0,160        | 0,353        | 1,000        | 0,862        | 1,000        | 1,000        | 0,349        | +Inf        | 0,757        | 1,243        | 0,462        |
| 128,500        | 0,230        | 0,148        | 0,339        | 1,000        | 0,862        | 1,000        | 1,000        | 0,345        | +Inf        | 0,770        | 1,230        | 0,452        |
| 133,000        | 0,216        | 0,137        | 0,324        | 1,000        | 0,862        | 1,000        | 1,000        | 0,341        | +Inf        | 0,784        | 1,216        | 0,442        |
| 133,300        | 0,203        | 0,126        | 0,310        | 1,000        | 0,862        | 1,000        | 1,000        | 0,337        | +Inf        | 0,797        | 1,203        | 0,433        |
| 136,300        | 0,176        | 0,105        | 0,280        | 1,000        | 0,862        | 1,000        | 1,000        | 0,330        | +Inf        | 0,824        | 1,176        | 0,413        |
| 137,500        | 0,162        | 0,094        | 0,265        | 1,000        | 0,862        | 1,000        | 1,000        | 0,326        | +Inf        | 0,838        | 1,162        | 0,404        |
| 139,000        | 0,149        | 0,084        | 0,249        | 1,000        | 0,862        | 1,000        | 1,000        | 0,323        | +Inf        | 0,851        | 1,149        | 0,394        |

|         |       |       |       |       |       |       |       |       |      |       |       |       |
|---------|-------|-------|-------|-------|-------|-------|-------|-------|------|-------|-------|-------|
| 142,000 | 0,135 | 0,074 | 0,234 | 1,000 | 0,862 | 1,000 | 1,000 | 0,319 | +Inf | 0,865 | 1,135 | 0,385 |
| 146,000 | 0,122 | 0,064 | 0,218 | 1,000 | 0,862 | 1,000 | 1,000 | 0,316 | +Inf | 0,878 | 1,122 | 0,375 |
| 154,000 | 0,108 | 0,054 | 0,202 | 1,000 | 0,862 | 1,000 | 1,000 | 0,313 | +Inf | 0,892 | 1,108 | 0,365 |
| 160,000 | 0,095 | 0,044 | 0,186 | 1,000 | 0,862 | 1,000 | 1,000 | 0,309 | +Inf | 0,905 | 1,095 | 0,356 |
| 166,000 | 0,081 | 0,035 | 0,170 | 1,000 | 0,862 | 1,000 | 1,000 | 0,306 | +Inf | 0,919 | 1,081 | 0,346 |
| 170,000 | 0,068 | 0,026 | 0,153 | 1,000 | 0,862 | 1,000 | 1,000 | 0,303 | +Inf | 0,932 | 1,068 | 0,337 |
| 172,000 | 0,054 | 0,018 | 0,136 | 1,000 | 0,862 | 1,000 | 1,000 | 0,300 | +Inf | 0,946 | 1,054 | 0,327 |
| 173,000 | 0,041 | 0,010 | 0,118 | 1,000 | 0,862 | 1,000 | 1,000 | 0,297 | +Inf | 0,959 | 1,041 | 0,317 |
| 196,000 | 0,027 | 0,002 | 0,100 | 1,000 | 0,862 | 1,000 | 1,000 | 0,294 | +Inf | 0,973 | 1,027 | 0,308 |
| 210,000 | 0,014 | 0,000 | 0,081 | 1,000 | 0,862 | 1,000 | 1,000 | 0,291 | +Inf | 0,986 | 1,014 | 0,298 |
| 220,000 | 0,000 | 0,000 | 0,061 | 1,000 | 0,862 | 1,000 |       | 0,288 |      | 1,000 | 1,000 | 0,288 |

| AUC   | Standard error | Lower bound (95%) | Upper bound (95%) |
|-------|----------------|-------------------|-------------------|
| 0,987 | 0,010          | 0,968             | 1,000             |

|                      |          |
|----------------------|----------|
| Difference           | 0,487    |
| z (Observed value)   | 50,470   |
| z (Critical value)   | 1,960    |
| p-value (Two-tailed) | < 0,0001 |
| alpha                | 0,05     |

- MN-CSA vs severe CTS (EDS-defined, Padua Scale >3) (as gold standard)

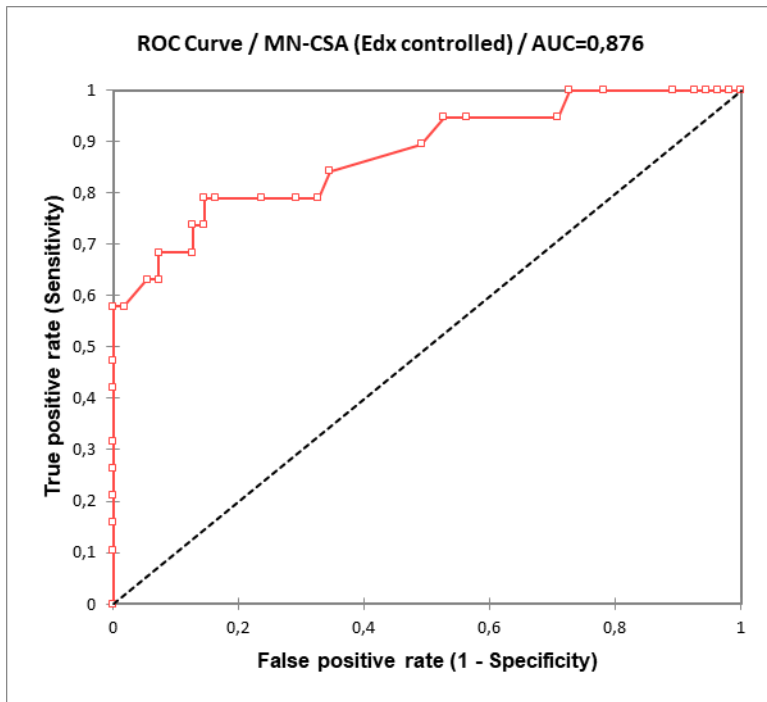

| MN-CSA (EDS controlled) | Sensitivity  | Lower bound (95%) | Upper bound (95%) | Specificity  | Lower bound (95%) | Upper bound (95%) | PPV          | NPV          | LR+          | LR-          | Sensitivity+Specificity | Accuracy     |
|-------------------------|--------------|-------------------|-------------------|--------------|-------------------|-------------------|--------------|--------------|--------------|--------------|-------------------------|--------------|
| 6,000                   | 1,000        | 0,798             | 1,000             | 0,018        | 0,000             | 0,107             | 0,260        | 1,000        | 1,019        | 0,000        | 1,018                   | 0,270        |
| 7,000                   | 1,000        | 0,798             | 1,000             | 0,036        | 0,004             | 0,132             | 0,264        | 1,000        | 1,038        | 0,000        | 1,036                   | 0,284        |
| 8,000                   | 1,000        | 0,798             | 1,000             | 0,055        | 0,014             | 0,156             | 0,268        | 1,000        | 1,058        | 0,000        | 1,055                   | 0,297        |
| 8,300                   | 1,000        | 0,798             | 1,000             | 0,073        | 0,025             | 0,179             | 0,271        | 1,000        | 1,078        | 0,000        | 1,073                   | 0,311        |
| 8,600                   | 1,000        | 0,798             | 1,000             | 0,109        | 0,048             | 0,223             | 0,279        | 1,000        | 1,122        | 0,000        | 1,109                   | 0,338        |
| 9,000                   | 1,000        | 0,798             | 1,000             | 0,218        | 0,129             | 0,346             | 0,306        | 1,000        | 1,279        | 0,000        | 1,218                   | 0,419        |
| 9,300                   | 1,000        | 0,798             | 1,000             | 0,273        | 0,173             | 0,404             | 0,322        | 1,000        | 1,375        | 0,000        | 1,273                   | 0,459        |
| 9,600                   | 0,947        | 0,732             | 1,000             | 0,291        | 0,188             | 0,423             | 0,316        | 0,941        | 1,336        | 0,181        | 1,238                   | 0,459        |
| 10,000                  | 0,947        | 0,732             | 1,000             | 0,436        | 0,314             | 0,567             | 0,367        | 0,960        | 1,681        | 0,121        | 1,384                   | 0,568        |
| 10,300                  | 0,947        | 0,732             | 1,000             | 0,473        | 0,347             | 0,602             | 0,383        | 0,963        | 1,797        | 0,111        | 1,420                   | 0,595        |
| 10,600                  | 0,895        | 0,671             | 0,981             | 0,509        | 0,381             | 0,636             | 0,386        | 0,933        | 1,823        | 0,207        | 1,404                   | 0,608        |
| 11,000                  | 0,842        | 0,614             | 0,951             | 0,655        | 0,522             | 0,766             | 0,457        | 0,923        | 2,438        | 0,241        | 1,497                   | 0,703        |
| 11,300                  | 0,789        | 0,560             | 0,919             | 0,673        | 0,540             | 0,782             | 0,455        | 0,902        | 2,412        | 0,313        | 1,462                   | 0,703        |
| 11,500                  | 0,789        | 0,560             | 0,919             | 0,709        | 0,577             | 0,812             | 0,484        | 0,907        | 2,714        | 0,297        | 1,499                   | 0,730        |
| 11,600                  | 0,789        | 0,560             | 0,919             | 0,764        | 0,635             | 0,857             | 0,536        | 0,913        | 3,340        | 0,276        | 1,553                   | 0,770        |
| 12,000                  | 0,789        | 0,560             | 0,919             | 0,836        | 0,714             | 0,913             | 0,625        | 0,920        | 4,825        | 0,252        | 1,626                   | 0,824        |
| <b>12,300</b>           | <b>0,789</b> | <b>0,560</b>      | <b>0,919</b>      | <b>0,855</b> | <b>0,735</b>      | <b>0,926</b>      | <b>0,652</b> | <b>0,922</b> | <b>5,428</b> | <b>0,246</b> | <b>1,644</b>            | <b>0,838</b> |
| 12,600                  | 0,737        | 0,508             | 0,884             | 0,855        | 0,735             | 0,926             | 0,636        | 0,904        | 5,066        | 0,308        | 1,591                   | 0,824        |
| 13,000                  | 0,737        | 0,508             | 0,884             | 0,873        | 0,756             | 0,939             | 0,667        | 0,906        | 5,789        | 0,302        | 1,610                   | 0,838        |
| 13,300                  | 0,684        | 0,458             | 0,847             | 0,873        | 0,756             | 0,939             | 0,650        | 0,889        | 5,376        | 0,362        | 1,557                   | 0,824        |
| 14,000                  | 0,684        | 0,458             | 0,847             | 0,927        | 0,821             | 0,975             | 0,765        | 0,895        | 9,408        | 0,341        | 1,611                   | 0,865        |
| 14,300                  | 0,632        | 0,409             | 0,808             | 0,927        | 0,821             | 0,975             | 0,750        | 0,879        | 8,684        | 0,397        | 1,559                   | 0,851        |
| 14,600                  | 0,632        | 0,409             | 0,808             | 0,945        | 0,844             | 0,986             | 0,800        | 0,881        | 11,579       | 0,390        | 1,577                   | 0,865        |

|               |              |              |              |              |              |              |              |              |             |              |              |              |
|---------------|--------------|--------------|--------------|--------------|--------------|--------------|--------------|--------------|-------------|--------------|--------------|--------------|
| 15,000        | 0,579        | 0,363        | 0,768        | 0,982        | 0,893        | 1,000        | 0,917        | 0,871        | 31,842      | 0,429        | 1,561        | 0,878        |
| <b>15,300</b> | <b>0,579</b> | <b>0,363</b> | <b>0,768</b> | <b>1,000</b> | <b>0,920</b> | <b>1,000</b> | <b>1,000</b> | <b>0,873</b> | <b>+Inf</b> | <b>0,421</b> | <b>1,579</b> | <b>0,892</b> |
| 16,000        | 0,474        | 0,274        | 0,682        | 1,000        | 0,920        | 1,000        | 1,000        | 0,846        | +Inf        | 0,526        | 1,474        | 0,865        |
| 16,600        | 0,421        | 0,232        | 0,637        | 1,000        | 0,920        | 1,000        | 1,000        | 0,833        | +Inf        | 0,579        | 1,421        | 0,851        |
| 17,000        | 0,316        | 0,153        | 0,542        | 1,000        | 0,920        | 1,000        | 1,000        | 0,809        | +Inf        | 0,684        | 1,316        | 0,824        |
| 17,300        | 0,263        | 0,116        | 0,492        | 1,000        | 0,920        | 1,000        | 1,000        | 0,797        | +Inf        | 0,737        | 1,263        | 0,811        |
| 19,000        | 0,211        | 0,081        | 0,440        | 1,000        | 0,920        | 1,000        | 1,000        | 0,786        | +Inf        | 0,789        | 1,211        | 0,797        |
| 19,600        | 0,158        | 0,049        | 0,386        | 1,000        | 0,920        | 1,000        | 1,000        | 0,775        | +Inf        | 0,842        | 1,158        | 0,784        |
| 21,000        | 0,105        | 0,019        | 0,329        | 1,000        | 0,920        | 1,000        | 1,000        | 0,764        | +Inf        | 0,895        | 1,105        | 0,770        |
| 22,000        | 0,000        | 0,000        | 0,202        | 1,000        | 0,920        | 1,000        |              | 0,743        |             | 1,000        | 1,000        | 0,743        |

| AUC   | Standard error | Lower bound (95%) | Upper bound (95%) |
|-------|----------------|-------------------|-------------------|
| 0,876 | 0,051          | 0,776             | 0,975             |

|                      |          |
|----------------------|----------|
| Difference           | 0,376    |
| z (Observed value)   | 7,372    |
| z (Critical value)   | 1,960    |
| p-value (Two-tailed) | < 0,0001 |
| alpha                | 0,05     |

- NTR vs severe CTS (EDS-defined, Padua Scale >3) (as gold standard)

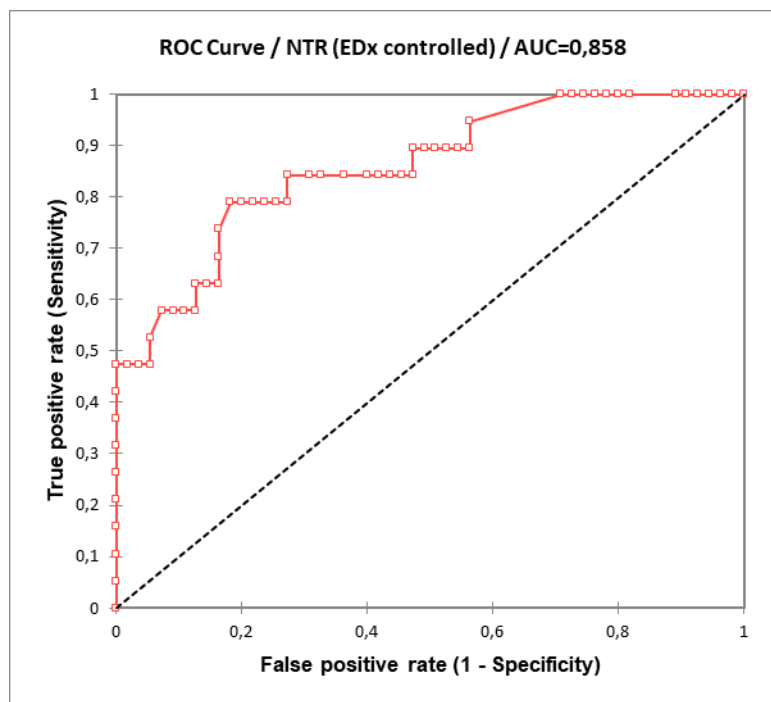

| NTR<br>(EDx<br>control<br>led) | Sensiti<br>vity | Lower<br>bound<br>(95%) | Upper<br>bound<br>(95%) | Specifi<br>city | Lower<br>bound<br>(95%) | Upper<br>bound<br>(95%) | PPV   | NPV   | LR+   | LR-   | Sensitivity+Speci<br>ficity | Accura<br>cy |
|--------------------------------|-----------------|-------------------------|-------------------------|-----------------|-------------------------|-------------------------|-------|-------|-------|-------|-----------------------------|--------------|
| 75,000                         | 1,000           | 0,798                   | 1,000                   | 0,018           | 0,000                   | 0,107                   | 0,260 | 1,000 | 1,019 | 0,000 | 1,018                       | 0,270        |
| 76,900                         | 1,000           | 0,798                   | 1,000                   | 0,036           | 0,004                   | 0,132                   | 0,264 | 1,000 | 1,038 | 0,000 | 1,036                       | 0,284        |
| 82,800                         | 1,000           | 0,798                   | 1,000                   | 0,055           | 0,014                   | 0,156                   | 0,268 | 1,000 | 1,058 | 0,000 | 1,055                       | 0,297        |
| 83,000                         | 1,000           | 0,798                   | 1,000                   | 0,073           | 0,025                   | 0,179                   | 0,271 | 1,000 | 1,078 | 0,000 | 1,073                       | 0,311        |
| 85,700                         | 1,000           | 0,798                   | 1,000                   | 0,091           | 0,036                   | 0,201                   | 0,275 | 1,000 | 1,100 | 0,000 | 1,091                       | 0,324        |
| 89,200                         | 1,000           | 0,798                   | 1,000                   | 0,109           | 0,048                   | 0,223                   | 0,279 | 1,000 | 1,122 | 0,000 | 1,109                       | 0,338        |
| 90,000                         | 1,000           | 0,798                   | 1,000                   | 0,182           | 0,101                   | 0,306                   | 0,297 | 1,000 | 1,222 | 0,000 | 1,182                       | 0,392        |
| 92,200                         | 1,000           | 0,798                   | 1,000                   | 0,200           | 0,115                   | 0,326                   | 0,302 | 1,000 | 1,250 | 0,000 | 1,200                       | 0,405        |
| 92,300                         | 1,000           | 0,798                   | 1,000                   | 0,218           | 0,129                   | 0,346                   | 0,306 | 1,000 | 1,279 | 0,000 | 1,218                       | 0,419        |
| 93,000                         | 1,000           | 0,798                   | 1,000                   | 0,236           | 0,143                   | 0,365                   | 0,311 | 1,000 | 1,310 | 0,000 | 1,236                       | 0,432        |
| 95,000                         | 1,000           | 0,798                   | 1,000                   | 0,255           | 0,158                   | 0,385                   | 0,317 | 1,000 | 1,341 | 0,000 | 1,255                       | 0,446        |
| 96,000                         | 1,000           | 0,798                   | 1,000                   | 0,273           | 0,173                   | 0,404                   | 0,322 | 1,000 | 1,375 | 0,000 | 1,273                       | 0,459        |
| 96,360                         | 1,000           | 0,798                   | 1,000                   | 0,291           | 0,188                   | 0,423                   | 0,328 | 1,000 | 1,410 | 0,000 | 1,291                       | 0,473        |
| 100,000                        | 0,947           | 0,732                   | 1,000                   | 0,436           | 0,314                   | 0,567                   | 0,367 | 0,960 | 1,681 | 0,121 | 1,384                       | 0,568        |
| 102,100                        | 0,895           | 0,671                   | 0,981                   | 0,436           | 0,314                   | 0,567                   | 0,354 | 0,923 | 1,587 | 0,241 | 1,331                       | 0,554        |
| 102,720                        | 0,895           | 0,671                   | 0,981                   | 0,455           | 0,331                   | 0,585                   | 0,362 | 0,926 | 1,640 | 0,232 | 1,349                       | 0,568        |
| 103,000                        | 0,895           | 0,671                   | 0,981                   | 0,473           | 0,347                   | 0,602                   | 0,370 | 0,929 | 1,697 | 0,223 | 1,367                       | 0,581        |
| 103,300                        | 0,895           | 0,671                   | 0,981                   | 0,491           | 0,364                   | 0,619                   | 0,378 | 0,931 | 1,758 | 0,214 | 1,386                       | 0,595        |
| 104,000                        | 0,895           | 0,671                   | 0,981                   | 0,509           | 0,381                   | 0,636                   | 0,386 | 0,933 | 1,823 | 0,207 | 1,404                       | 0,608        |
| 105,400                        | 0,895           | 0,671                   | 0,981                   | 0,527           | 0,398                   | 0,653                   | 0,395 | 0,935 | 1,893 | 0,200 | 1,422                       | 0,622        |
| 106,000                        | 0,842           | 0,614                   | 0,951                   | 0,527           | 0,398                   | 0,653                   | 0,381 | 0,906 | 1,781 | 0,299 | 1,369                       | 0,608        |



|         |       |       |       |       |       |       |       |       |        |       |       |       |
|---------|-------|-------|-------|-------|-------|-------|-------|-------|--------|-------|-------|-------|
| 106,600 | 0,842 | 0,614 | 0,951 | 0,545 | 0,415 | 0,669 | 0,390 | 0,909 | 1,853  | 0,289 | 1,388 | 0,622 |
| 107,600 | 0,842 | 0,614 | 0,951 | 0,564 | 0,433 | 0,686 | 0,400 | 0,912 | 1,930  | 0,280 | 1,406 | 0,635 |
| 107,690 | 0,842 | 0,614 | 0,951 | 0,582 | 0,450 | 0,702 | 0,410 | 0,914 | 2,014  | 0,271 | 1,424 | 0,649 |
| 109,100 | 0,842 | 0,614 | 0,951 | 0,600 | 0,468 | 0,719 | 0,421 | 0,917 | 2,105  | 0,263 | 1,442 | 0,662 |
| 110,000 | 0,842 | 0,614 | 0,951 | 0,636 | 0,504 | 0,751 | 0,444 | 0,921 | 2,316  | 0,248 | 1,478 | 0,689 |
| 111,000 | 0,842 | 0,614 | 0,951 | 0,673 | 0,540 | 0,782 | 0,471 | 0,925 | 2,573  | 0,235 | 1,515 | 0,716 |
| 111,800 | 0,842 | 0,614 | 0,951 | 0,691 | 0,559 | 0,797 | 0,485 | 0,927 | 2,724  | 0,229 | 1,533 | 0,730 |
| 112,500 | 0,842 | 0,614 | 0,951 | 0,727 | 0,596 | 0,827 | 0,516 | 0,930 | 3,088  | 0,217 | 1,569 | 0,757 |
| 113,000 | 0,789 | 0,560 | 0,919 | 0,727 | 0,596 | 0,827 | 0,500 | 0,909 | 2,895  | 0,289 | 1,517 | 0,743 |
| 114,400 | 0,789 | 0,560 | 0,919 | 0,745 | 0,615 | 0,842 | 0,517 | 0,911 | 3,102  | 0,282 | 1,535 | 0,757 |
| 115,000 | 0,789 | 0,560 | 0,919 | 0,764 | 0,635 | 0,857 | 0,536 | 0,913 | 3,340  | 0,276 | 1,553 | 0,770 |
| 116,000 | 0,789 | 0,560 | 0,919 | 0,782 | 0,654 | 0,871 | 0,556 | 0,915 | 3,618  | 0,269 | 1,571 | 0,784 |
| 116,200 | 0,789 | 0,560 | 0,919 | 0,800 | 0,674 | 0,885 | 0,577 | 0,917 | 3,947  | 0,263 | 1,589 | 0,797 |
| 116,250 | 0,789 | 0,560 | 0,919 | 0,818 | 0,694 | 0,899 | 0,600 | 0,918 | 4,342  | 0,257 | 1,608 | 0,811 |
| 120,000 | 0,737 | 0,508 | 0,884 | 0,836 | 0,714 | 0,913 | 0,609 | 0,902 | 4,503  | 0,315 | 1,573 | 0,811 |
| 120,900 | 0,684 | 0,458 | 0,847 | 0,836 | 0,714 | 0,913 | 0,591 | 0,885 | 4,181  | 0,378 | 1,521 | 0,797 |
| 122,000 | 0,632 | 0,409 | 0,808 | 0,836 | 0,714 | 0,913 | 0,571 | 0,868 | 3,860  | 0,441 | 1,468 | 0,784 |
| 122,200 | 0,632 | 0,409 | 0,808 | 0,855 | 0,735 | 0,926 | 0,600 | 0,870 | 4,342  | 0,431 | 1,486 | 0,797 |
| 122,800 | 0,632 | 0,409 | 0,808 | 0,873 | 0,756 | 0,939 | 0,632 | 0,873 | 4,962  | 0,422 | 1,504 | 0,811 |
| 126,000 | 0,579 | 0,363 | 0,768 | 0,873 | 0,756 | 0,939 | 0,611 | 0,857 | 4,549  | 0,482 | 1,452 | 0,797 |
| 128,500 | 0,579 | 0,363 | 0,768 | 0,891 | 0,777 | 0,952 | 0,647 | 0,860 | 5,307  | 0,473 | 1,470 | 0,811 |
| 133,000 | 0,579 | 0,363 | 0,768 | 0,909 | 0,799 | 0,964 | 0,688 | 0,862 | 6,368  | 0,463 | 1,488 | 0,824 |
| 133,300 | 0,579 | 0,363 | 0,768 | 0,927 | 0,821 | 0,975 | 0,733 | 0,864 | 7,961  | 0,454 | 1,506 | 0,838 |
| 136,300 | 0,526 | 0,318 | 0,726 | 0,945 | 0,844 | 0,986 | 0,769 | 0,852 | 9,649  | 0,501 | 1,472 | 0,838 |
| 137,500 | 0,474 | 0,274 | 0,682 | 0,945 | 0,844 | 0,986 | 0,750 | 0,839 | 8,684  | 0,557 | 1,419 | 0,824 |
| 139,000 | 0,474 | 0,274 | 0,682 | 0,964 | 0,868 | 0,996 | 0,818 | 0,841 | 13,026 | 0,546 | 1,437 | 0,838 |
| 142,000 | 0,474 | 0,274 | 0,682 | 0,982 | 0,893 | 1,000 | 0,900 | 0,844 | 26,053 | 0,536 | 1,456 | 0,851 |
| 146,000 | 0,474 | 0,274 | 0,682 | 1,000 | 0,920 | 1,000 | 1,000 | 0,846 | +Inf   | 0,526 | 1,474 | 0,865 |
| 154,000 | 0,421 | 0,232 | 0,637 | 1,000 | 0,920 | 1,000 | 1,000 | 0,833 | +Inf   | 0,579 | 1,421 | 0,851 |
| 160,000 | 0,368 | 0,192 | 0,591 | 1,000 | 0,920 | 1,000 | 1,000 | 0,821 | +Inf   | 0,632 | 1,368 | 0,838 |
| 166,000 | 0,316 | 0,153 | 0,542 | 1,000 | 0,920 | 1,000 | 1,000 | 0,809 | +Inf   | 0,684 | 1,316 | 0,824 |
| 170,000 | 0,263 | 0,116 | 0,492 | 1,000 | 0,920 | 1,000 | 1,000 | 0,797 | +Inf   | 0,737 | 1,263 | 0,811 |
| 172,000 | 0,211 | 0,081 | 0,440 | 1,000 | 0,920 | 1,000 | 1,000 | 0,786 | +Inf   | 0,789 | 1,211 | 0,797 |
| 173,000 | 0,158 | 0,049 | 0,386 | 1,000 | 0,920 | 1,000 | 1,000 | 0,775 | +Inf   | 0,842 | 1,158 | 0,784 |
| 196,000 | 0,105 | 0,019 | 0,329 | 1,000 | 0,920 | 1,000 | 1,000 | 0,764 | +Inf   | 0,895 | 1,105 | 0,770 |

|             |       |       |       |       |       |       |       |       |      |       |       |       |
|-------------|-------|-------|-------|-------|-------|-------|-------|-------|------|-------|-------|-------|
| 210,00<br>0 | 0,053 | 0,000 | 0,268 | 1,000 | 0,920 | 1,000 | 1,000 | 0,753 | +Inf | 0,947 | 1,053 | 0,757 |
| 220,00<br>0 | 0,000 | 0,000 | 0,202 | 1,000 | 0,920 | 1,000 |       | 0,743 |      | 1,000 | 1,000 | 0,743 |

| AUC   | Standard error | Lower bound (95%) | Upper bound (95%) |
|-------|----------------|-------------------|-------------------|
| 0,858 | 0,051          | 0,759             | 0,958             |

|                      |          |
|----------------------|----------|
| Difference           | 0,358    |
| z (Observed value)   | 7,060    |
| z (Critical value)   | 1,960    |
| p-value (Two-tailed) | < 0,0001 |
| alpha                | 0,05     |
