# Supplementary material for: A Novel Ultrasonographic Anthropometric-Independent Measurement of Median Nerve Swelling in Carpal Tunnel Syndrome: The “Nerve/Tendon Ratio” (NTR)
Source: MDPI journal article supplement (doi:10.3390/diagnostics12112621), 2022-10-28
Supplement: s1 [file s1]

# Correlation Matrix

Correlation Matrix

|                       |                | MN-CSA     | NTR        | BMI       | Height (cm) | Wrist circumf. | SCV sens.conduct.vel. | ML Motor Latency | Padua>3   | Padua Scale |
|-----------------------|----------------|------------|------------|-----------|-------------|----------------|-----------------------|------------------|-----------|-------------|
| MN-CSA                | Spearman's rho | —          |            |           |             |                |                       |                  |           |             |
|                       | p-value        | —          |            |           |             |                |                       |                  |           |             |
| NTR                   | Spearman's rho | 0.515 ***  | —          |           |             |                |                       |                  |           |             |
|                       | p-value        | < .001     | —          |           |             |                |                       |                  |           |             |
| BMI                   | Spearman's rho | 0.050      | -0.161     | —         |             |                |                       |                  |           |             |
|                       | p-value        | 0.674      | 0.170      | —         |             |                |                       |                  |           |             |
| Height (cm)           | Spearman's rho | 0.120      | -0.171     | 0.262 *   | —           |                |                       |                  |           |             |
|                       | p-value        | 0.308      | 0.146      | 0.024     | —           |                |                       |                  |           |             |
| Wrist circumf.        | Spearman's rho | 0.159      | -0.127     | 0.463 *** | 0.749 ***   | —              |                       |                  |           |             |
|                       | p-value        | 0.177      | 0.282      | < .001    | < .001      | —              |                       |                  |           |             |
| SCV sens.conduct.vel. | Spearman's rho | -0.550 *** | -0.611 *** | 0.030     | -0.032      | -0.074         | —                     |                  |           |             |
|                       | p-value        | < .001     | < .001     | 0.800     | 0.788       | 0.528          | —                     |                  |           |             |
| ML Motor Latency      | Spearman's rho | 0.468 ***  | 0.558 ***  | -0.010    | 0.189       | 0.278 *        | -0.898 ***            | —                |           |             |
|                       | p-value        | < .001     | < .001     | 0.934     | 0.120       | 0.021          | < .001                | —                |           |             |
| Padua>3               | Spearman's rho | 0.570 ***  | 0.543 ***  | -0.026    | 0.012       | 0.088          | -0.763 ***            | 0.653 ***        | —         |             |
|                       | p-value        | < .001     | < .001     | 0.825     | 0.917       | 0.454          | < .001                | < .001           | —         |             |
| Padua Scale           | Spearman's rho | 0.636 ***  | 0.650 ***  | -0.043    | 0.083       | 0.086          | -0.930 ***            | 0.862 ***        | 0.793 *** | —           |
|                       | p-value        | < .001     | < .001     | 0.717     | 0.481       | 0.464          | < .001                | < .001           | < .001    | —           |

Note. \* p < .05, \*\* p < .01, \*\*\* p < .001
