# Supplementary material for: A Novel Ultrasonographic Anthropometric-Independent Measurement of Median Nerve Swelling in Carpal Tunnel Syndrome: The “Nerve/Tendon Ratio” (NTR)
Source: MDPI journal article supplement (doi:10.3390/diagnostics12112621), 2022-10-28
Supplement: s1 [file s1]

## One-Way ANOVA (Non-parametric)

Kruskal-Wallis

|        | $\chi^2$ | df | p      |
|--------|----------|----|--------|
| NTR    | 32.6     | 5  | < .001 |
| MN-CSA | 32.8     | 5  | < .001 |

## Dwass-Steel-Critchlow-Fligner pairwise comparisons

Pairwise comparisons - NTR

|   |   | W    | p     |
|---|---|------|-------|
| 0 | 1 | 1.90 | 0.762 |
| 0 | 2 | 2.95 | 0.294 |
| 0 | 3 | 3.77 | 0.082 |
| 0 | 4 | 3.71 | 0.092 |
| 0 | 5 | 3.29 | 0.185 |
| 1 | 2 | 0.00 | 1.000 |
| 1 | 3 | 1.58 | 0.873 |
| 1 | 4 | 2.11 | 0.671 |
| 1 | 5 | 2.12 | 0.665 |
| 2 | 3 | 3.54 | 0.123 |
| 2 | 4 | 4.98 | 0.006 |
| 2 | 5 | 5.07 | 0.005 |
| 3 | 4 | 3.38 | 0.161 |
| 3 | 5 | 4.96 | 0.006 |
| 4 | 5 | 2.98 | 0.285 |

Pairwise comparisons - MN-CSA

|   |   | W     | p     |
|---|---|-------|-------|
| 0 | 1 | 0.632 | 0.998 |
| 0 | 2 | 2.466 | 0.503 |
| 0 | 3 | 3.343 | 0.169 |
| 0 | 4 | 3.522 | 0.127 |
| 0 | 5 | 3.300 | 0.181 |
| 1 | 2 | 1.478 | 0.903 |
| 1 | 3 | 2.027 | 0.707 |
| 1 | 4 | 2.283 | 0.589 |
| 1 | 5 | 2.141 | 0.656 |
| 2 | 3 | 2.586 | 0.447 |
| 2 | 4 | 4.935 | 0.006 |
| 2 | 5 | 5.290 | 0.003 |
| 3 | 4 | 3.810 | 0.076 |
| 3 | 5 | 5.367 | 0.002 |
| 4 | 5 | 3.664 | 0.100 |
